# Supplementary material for: Identify the Prognostic and Immune Profile of VSIR in the Tumor Microenvironment: A Pan-Cancer Analysis
Source: Front Cell Dev Biol. 2022 Apr 12;10:821649. doi: 10.3389/fcell.2022.821649 (PMC9039624; doi:10.3389/fcell.2022.821649)
Supplement: Supplementary file 1 [file Table2.XLSX]

## Sheet: SheetName
cancertype	sur_type	logrankp
ACC	os	0.00387186
ACC	pfs	0.0347884
ACC	dss	0.00263821
ACC	dfi	0.345291
BLCA	os	0.0435065
BLCA	pfs	0.223363
BLCA	dss	0.108127
BLCA	dfi	0.317971
BRCA	os	0.294728
BRCA	pfs	0.500628
BRCA	dss	0.637781
BRCA	dfi	0.270838
CESC	os	0.317367
CESC	pfs	0.122133
CESC	dss	0.322161
CESC	dfi	0.0212852
CHOL	os	0.959513
CHOL	pfs	0.914305
CHOL	dss	0.971457
CHOL	dfi	0.188666
COAD	os	0.763186
COAD	pfs	0.193201
COAD	dss	0.939906
COAD	dfi	0.0333267
DLBC	os	0.343271
DLBC	pfs	0.662389
DLBC	dss	0.471885
DLBC	dfi	0.0307536
ESCA	os	0.881411
ESCA	pfs	0.190462
ESCA	dss	0.457853
ESCA	dfi	0.110938
GBM	os	0.000274523
GBM	pfs	0.00029259
GBM	dss	0.000348154
GBM	dfi
HNSC	os	0.603704
HNSC	pfs	0.419019
HNSC	dss	0.629701
HNSC	dfi	0.378663
KICH	os	0.313832
KICH	pfs	0.748806
KICH	dss	0.421484
KICH	dfi	0.0572096
KIRC	os	0.823935
KIRC	pfs	0.462227
KIRC	dss	0.365173
KIRC	dfi	0.736241
KIRP	os	0.00437581
KIRP	pfs	0.00768479
KIRP	dss	0.000104597
KIRP	dfi	0.0197078
LGG	os	0
LGG	pfs	0
LGG	dss	0
LGG	dfi	1.40126e-07
LIHC	os	0.270448
LIHC	pfs	0.529808
LIHC	dss	0.179568
LIHC	dfi	0.715812
LUAD	os	0.923836
LUAD	pfs	0.837882
LUAD	dss	0.958504
LUAD	dfi	0.559599
LUSC	os	0.182548
LUSC	pfs	0.177121
LUSC	dss	0.490314
LUSC	dfi	0.9336
MESO	os	4.7462e-05
MESO	pfs	0.0614187
MESO	dss	6.9025e-05
MESO	dfi
OV	os	0.488413
OV	pfs	0.738564
OV	dss	0.300691
OV	dfi	0.769917
PAAD	os	0.345555
PAAD	pfs	0.079932
PAAD	dss	0.902645
PAAD	dfi	0.540971
PCPG	os	0.580477
PCPG	pfs	0.777526
PCPG	dss	0.669614
PCPG	dfi	0.5627
PRAD	os	0.709278
PRAD	pfs	0.555324
PRAD	dss	0.675837
PRAD	dfi	0.109826
READ	os	0.112832
READ	pfs	0.355512
READ	dss	0.0490516
READ	dfi	0.478578
SARC	os	0.29904
SARC	pfs	0.433568
SARC	dss	0.451011
SARC	dfi	0.964212
STAD	os	0.65177
STAD	pfs	0.426937
STAD	dss	0.533816
STAD	dfi	0.742939
TGCT	os	0.731134
TGCT	pfs	0.379583
TGCT	dss	0.815396
TGCT	dfi	0.577108
THCA	os	0.602119
THCA	pfs	0.33017
THCA	dss	0.732458
THCA	dfi	0.0248157
THYM	os
THYM	pfs
THYM	dss
THYM	dfi
UCEC	os	0.0166346
UCEC	pfs	0.00047555
UCEC	dss	0.0444411
UCEC	dfi	0.0509492
UCS	os	0.82587
UCS	pfs	0.984496
UCS	dss	0.872702
UCS	dfi	0.921689
UVM	os
UVM	pfs
UVM	dss
UVM	dfi
