# Supplementary material for: Identify the Prognostic and Immune Profile of VSIR in the Tumor Microenvironment: A Pan-Cancer Analysis
Source: Front Cell Dev Biol. 2022 Apr 12;10:821649. doi: 10.3389/fcell.2022.821649 (PMC9039624; doi:10.3389/fcell.2022.821649)
Supplement: Supplementary file 2 [file Table3.xlsx]

## Sheet: SheetName
symbol	drug	cor	fdr
VSIR	Sunitinib	-0.34141	1.08397e-09
VSIR	WZ-1-84	-0.304544	4.87245e-07
VSIR	Gefitinib	-0.280708	6.58937e-15
VSIR	Afatinib	-0.268929	1.17347e-15
VSIR	Sorafenib	-0.268247	1.3103e-05
VSIR	Dasatinib	-0.221766	0.000183254
VSIR	Erlotinib	-0.215175	0.000703606
VSIR	KIN001-055	-0.195414	2.47186e-06
VSIR	RDEA119	-0.195275	1.27482e-08
VSIR	XL-184	-0.18509	8.49376e-07
VSIR	PD-0325901	-0.183348	8.17662e-07
VSIR	CI-1040	-0.182105	2.15225e-06
VSIR	Linifanib	-0.181863	1.28718e-06
VSIR	AICAR	-0.181475	1.16996e-06
VSIR	Trametinib	-0.176085	5.9949e-07
VSIR	17-AAG	-0.16749	3.52559e-06
VSIR	Bosutinib	-0.162055	9.628e-05
VSIR	Cetuximab	-0.16089	1.8396e-05
VSIR	VNLG/124	-0.155418	2.8183e-05
VSIR	EKB-569	-0.150371	4.7854e-05
VSIR	FR-180204	-0.144683	0.000480468
VSIR	XAV939	-0.141389	0.000135284
VSIR	RO-3306	-0.141077	0.000383706
VSIR	Docetaxel	-0.132711	0.000312766
VSIR	ATRA	-0.13173	0.00148707
VSIR	selumetinib	-0.126455	0.000361012
VSIR	BIX02189	-0.119642	0.000794293
VSIR	PLX4720	0.119842	0.00146444
VSIR	UNC0638	0.125258	0.000281239
VSIR	SB52334	0.152457	7.7974e-05
