# Supplementary material for: Identify the Prognostic and Immune Profile of VSIR in the Tumor Microenvironment: A Pan-Cancer Analysis
Source: Front Cell Dev Biol. 2022 Apr 12;10:821649. doi: 10.3389/fcell.2022.821649 (PMC9039624; doi:10.3389/fcell.2022.821649)
Supplement: Supplementary file 4 [file Table1.xlsx]

## Sheet: SheetName
symbol	drug	cor	fdr
VSIR	dasatinib	-0.278065	1.00883e-12
VSIR	vincristine	0.227732	2.35833e-10
VSIR	entinostat	0.233923	3.9166e-10
VSIR	LY-2183240	0.221888	1.72021e-09
VSIR	BRD-K34222889	0.220833	2.53155e-09
VSIR	erlotinib	-0.226085	6.3656e-09
VSIR	saracatinib	-0.232083	6.41888e-09
VSIR	necrosulfonamide	0.259552	9.42798e-09
VSIR	PRIMA-1	0.213094	2.76974e-08
VSIR	KX2-391	0.206581	3.31778e-08
VSIR	BIX-01294	0.207282	3.96869e-08
VSIR	MST-312	0.205577	5.18968e-08
VSIR	piperlongumine	0.200739	5.9424e-08
VSIR	nutlin-3	0.208063	6.64154e-08
VSIR	cerulenin	0.20244	7.3822e-08
VSIR	SB-225002	0.195256	1.04111e-07
VSIR	obatoclax	0.197928	1.23627e-07
VSIR	PX-12	0.195703	1.78278e-07
VSIR	PL-DI	0.195794	1.95175e-07
VSIR	marinopyrrole A	0.244151	4.23773e-07
VSIR	doxorubicin	0.184827	4.66416e-07
VSIR	triazolothiadiazine	0.184662	4.79738e-07
VSIR	vorinostat	0.188643	5.1371e-07
VSIR	parbendazole	0.183071	6.12067e-07
VSIR	belinostat	0.264719	7.52656e-07
VSIR	vandetanib	-0.212134	7.89796e-07
VSIR	SU11274	0.191157	9.18183e-07
VSIR	panobinostat	0.181767	9.49698e-07
VSIR	BI-2536	0.178424	1.12531e-06
VSIR	ISOX	0.181317	1.40286e-06
